# Supplementary material for: Polymer Coating of Carbon Nanotube Fibers for Electric Microcables
Source: MDPI journal article supplement (doi:10.3390/nano4040879), 2014-11-04
Supplement: s1 [file s1]

## Supporting Information

**Figure S1.** Scanning electron microscopy (SEM) image of carbon nanotube (CNT) fiber loops that form as a result of the stress stores within the fiber/thread on the uncoated and polymer coated 2-ply CNT threads.

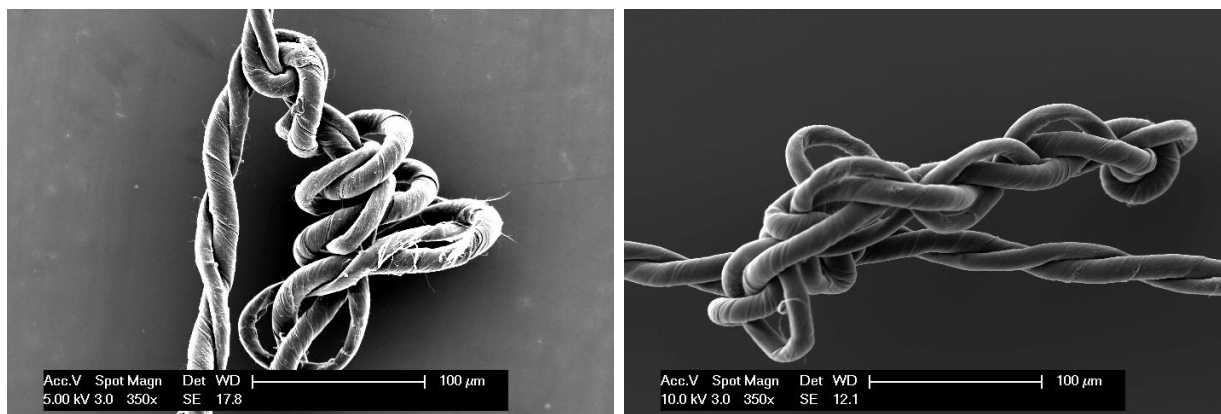

**Figure S2.** Electrical resistivity measurements of as-spun CNT fibers (reference), acetone densified CNT fibers (solvent densified) and CNT fiber after doping (Au doping).

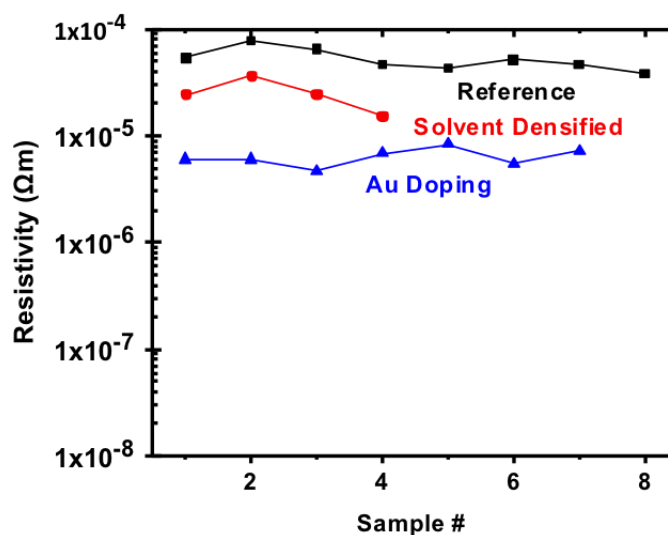

© 2014 by the authors; licensee MDPI, Basel, Switzerland. This article is an open access article distributed under the terms and conditions of the Creative Commons Attribution license (<http://creativecommons.org/licenses/by/4.0/>).
